# Supplementary material
Source: MDPI journal article supplement (https://www.mdpi.com/2073-4395/13/4/1139)
Supplement: s1 [file s1 › agronomy-2331838-supplementary.pdf]

# Efficient Micropropagation of Genetically Stable *Panax ginseng* Meyer by Somatic Embryogenesis

## Supplementary Materials

Jung-Woo Lee<sup>1,2</sup>, Jang-Uk Kim<sup>1</sup>, Kyong-Hwan Bang<sup>1</sup>, Dong-Hwi Kim<sup>1</sup>, Ick-Hyun Jo<sup>3</sup> and Young-Doo Park<sup>2,\*</sup>

<sup>1</sup> Department of Herbal Crop Research, National Institute of Horticultural and Herbal Science, Rural Development Administration, Eumseong 27709, Republic of Korea

<sup>2</sup> Department of Horticultural Biotechnology, Kyung Hee University, Yongin 17104, Republic of Korea

<sup>3</sup> Department of Crop Science and Biotechnology, Dankook University, Cheonan, 31116, Republic of Korea

\* Correspondence: ydpark@khu.ac.kr

**Table S1.** List of primers used for detecting the genetic stability of regenerated plant from somatic embryogenesis of *P. ginseng*.

| Type | Primer code    | Sequence (5'–3')                                                 | Number of amplicon | Amplicon size range (bp) |
|------|----------------|------------------------------------------------------------------|--------------------|--------------------------|
| SSR  | <i>gws218</i>  | (F) TCAAATAATCATATCACACCCATCA<br>(R) ACCAAAATAAAGATTAGCGACAATG   | 3                  | 50–150                   |
|      | <i>gws450</i>  | (F) TGGTAATAGTTGAGACAAAATTGCAT<br>(R) GGTTTGTTTCATTGTATATGCTCCTG | 4                  | 60–200                   |
|      | <i>gws454</i>  | (F) AAGGAATACAAGAAAGAGGGAGAA<br>(R) TAAAGAATTTGGATCCACCTACAAA    | 3                  | 100–140                  |
|      | <i>gws936</i>  | (F) AGAGTAGCAGACTAGCAGTGGAGAG<br>(R) TGTTCTTTTAGGCATTCCGGTATGTA  | 1                  | 75                       |
|      | <i>gws1070</i> | (F) TTCCAAACATAAAAGAAAAGTACC<br>(R) GTCTTGAAAACCTTACCGAATTGAAA   | 1                  | 78                       |
|      |                |                                                                  |                    |                          |
| RAPD | <i>UBC536</i>  | GCC CCT CGT C                                                    | 4                  | 400–900                  |
|      | <i>UBC540</i>  | CGG ACC GCG T                                                    | 1                  | 380                      |
|      | <i>UBC594</i>  | AGG AGC TGG C                                                    | 4                  | 440–600                  |

SSR, simple sequence repeats; RAPD, random amplified polymorphic DNA.

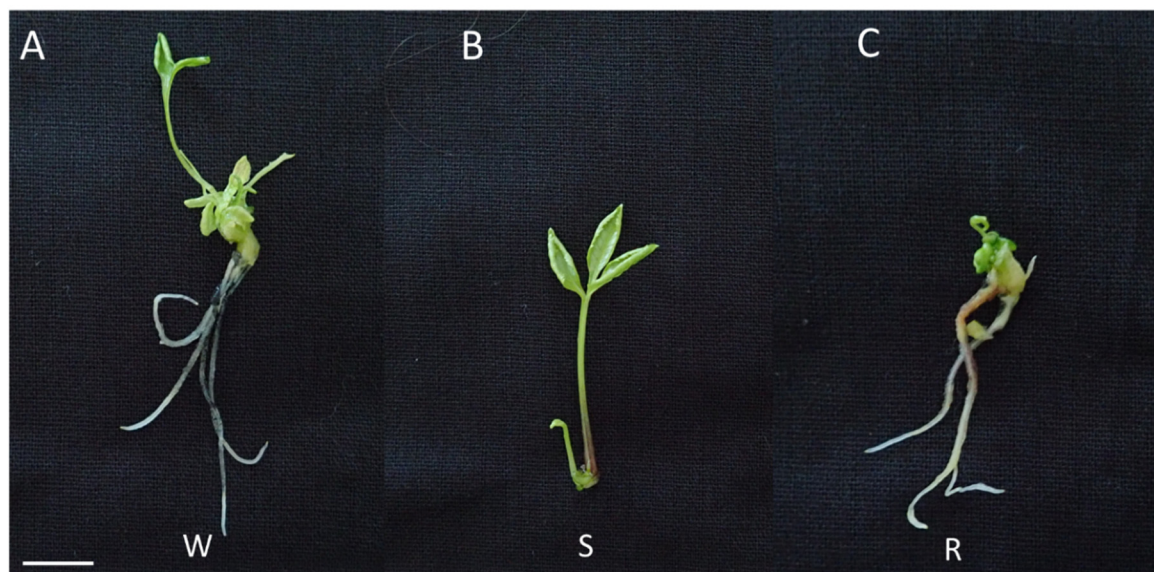

**Figure S1.** Classification of regenerated plants into three types according to their morphology (A) W: Whole plant (B) S: Shoot only (C) R: Root with rhizome. Scale bar, 1 cm.

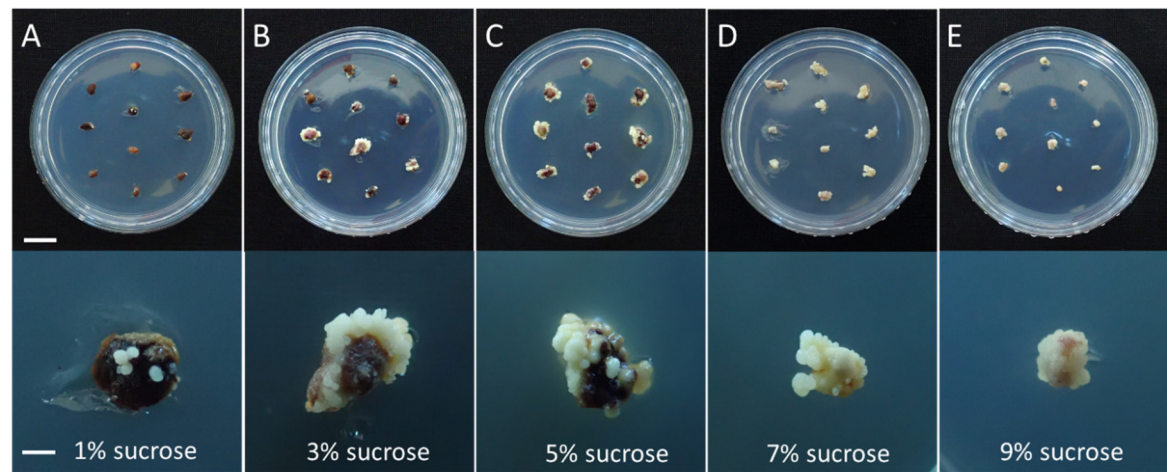

**Figure S2.** Somatic embryogenesis according to sucrose concentration in *P. ginseng* 60 days after inoculation. (A) 1%, (B) 3%, (C) 5%, (D) 7%, and (E) 9% sucrose. Scale bars, upper 1 cm; lower 1 mm.

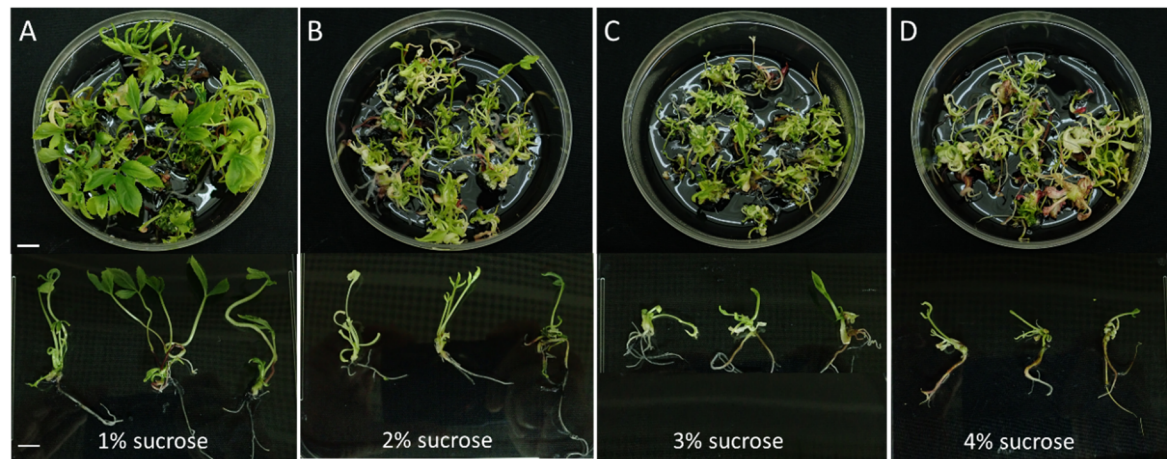

**Figure S3.** Plant regeneration according to sucrose concentration in the germination medium 60 days after transfer to elongation medium. (A) 1%, (B) 2%, (C) 3%, and (D) 4% sucrose. Scale bars, 1 cm.
